# Supplementary material
Source: PubMed Central journal article supplement (PMC6497155)
Supplement: NIHMS1018805-supplement-Supplemental.pdf [file NIHMS1018805-supplement-Supplemental.pdf]

## SUPPORTING INFORMATION

### ***Clostridium difficile* ClpP Homologs are Capable of Uncoupled Activity and Exhibit Different Levels of Susceptibility to Acyldepsipeptide Modulation**

Nathan P. Lavey,<sup>a</sup> Tyler Shadid,<sup>b</sup> Jimmy D. Ballard,<sup>b</sup> and Adam S. Duerfeldt<sup>a\*</sup>

<sup>a</sup>*Institute for Natural Products Applications and Research Technologies and Department of Chemistry & Biochemistry, Stephenson Life Sciences Research Center, Norman, Oklahoma 73019*

<sup>b</sup>*Department of Microbiology & Immunology, University of Oklahoma Health Sciences Center, Oklahoma City, Oklahoma 73014*

\*Corresponding author

Email address: [adam.duerfeldt@ou.edu](mailto:adam.duerfeldt@ou.edu) (A.S. Duerfeldt)

#### **Table of Contents**

##### Tables

|                                     |    |
|-------------------------------------|----|
| Table S1: Primers for qRT-PCR ..... | S2 |
| Table S2: qRT-PCR Ct counts .....   | S2 |

##### Figures

|                                                                                              |    |
|----------------------------------------------------------------------------------------------|----|
| Figure S1: HR-ESIMS peptide digest and sequencing results.....                               | S2 |
| Figure S2: pUNK DLS results for ClpP1 prepared from $\Delta EcClpP$ cells.....               | S3 |
| Figure S3: pUNK DLS results for ClpP2 prepared from $\Delta EcClpP$ cells.....               | S4 |
| Figure S4: Location of possible disulfide bridges in ClpP2 .....                             | S5 |
| Figure S5: Reduction or oxidation of ClpP2 has no consequences on proteolytic activity ..... | S6 |
| Figure S6: Mixed ClpP peptidolytic assessment .....                                          | S7 |
| Figure S7: Non-denaturing gel of mixed solution .....                                        | S7 |
| Figure S8: ClpXP ssrA-GFP visualization by SDS-PAGE gel .....                                | S8 |
| Figure S9: Raw data replicates of ClpP1 + ADEP thermal shift experiments .....               | S9 |
| Figure S10: Raw data replicates of ClpP2 + ADEP thermal shift experiments.....               | S9 |

**Table S1.** qRT-PCR Primers. Integrated DNA Technologies (IDT) PrimerQuest tool was used to pick primer pairs for *clpP1* and *clpP2*. *rpoB*, the gene that encodes the  $\beta$ -subunit of bacterial RNA polymerase, was used as the reference gene.

| Primer ID | Primer Sequence (5'-3')  |
|-----------|--------------------------|
| rpoB_F    | AACTAGGGCCAGAGGAAATAAC   |
| rpoB_R    | CTGAGTCTACTTCTGCACCTATTC |
| clpP1_F   | GCTGAAGACCCAGACAAAGATA   |
| clpP1_R   | CTCCCATAGAAGCAGCCATAC    |
| clpP2_F   | GGCTCTGCTACATCAGGATTTG   |
| clpP2_R   | CATGTGTTCCCTCCTGCAAGTAA  |

**Table S2.** Ct counts for qRT-PCR

|             | <i>clpP1</i>     | <i>clpP2</i>     | <i>rpoB</i>      |
|-------------|------------------|------------------|------------------|
| <b>Exp</b>  | 14.80 $\pm$ 0.02 | 20.88 $\pm$ 0.02 | 16.81 $\pm$ 0.00 |
| <b>Stat</b> | 17.34 $\pm$ 0.01 | 22.68 $\pm$ 0.02 | 19.89 $\pm$ 0.02 |

```

A0A125YDM9_CLODI MSLVPPHVIEQTGQGERSYDIYSKLLKDRIFIGEEINDAIASLVVAQLLFLESEDPSDI 60
U3V0G5_CLODI MALVPVVVEQTGRGERSYDIFSRLLKDRIFLGDQVNDATAGLIVAQLLFLEAEDPKDI 60
*:*** *:*****:*****:*****:*****:*****:*****:*****:*****:*** **
A0A125YDM9_CLODI IIYINSPGGSATSGFAIYDTMNYVRCDVSTICIGMAASMSAFLLAGGTHGKRCALPNSEI 120
U3V0G5_CLODI HLIYINSPGGSITSGMAIYDTMQYIKPDVSTICIGMAASMGAFLLAAGAKGKRLLALPNSEI 120
:***** ***:*****:***: *****.*****.***:*** *****
A0A125YDM9_CLODI MIHQPMGGAKGOATDVKIAVDNILKIKERLDKILSENTGKSIEDIRRDTDRDNFMTALEA 180
U3V0G5_CLODI MIHQPLGGAQGOATDIEIHAKRIILKIKETLNEILSERTGOPLEKIKMDTERDNFMSALEA 180
*****:***:*****:*** ..***** *:*****.***:***: ***:*****:*****
A0A125YDM9_CLODI KEYGLIDYIMNRNE 194
U3V0G5_CLODI KEYGLIDEVFTKRP 194
***** :...

```

**Figure S1.** HR-ESIMS peptide digest and sequencing results. Combined sequence coverage of ClpP1 (bottom) and ClpP2 (top) prepared from  $\Delta E_c$ -ClpP. Coverage obtained following data merging after trypsin and chymotrypsin digest. Bold underline: identified sequence; green: amino acids differing between the two isoforms.

## ClpP1 $\Delta EcClpP$

|                          |                        |                        |        |                     |                   |
|--------------------------|------------------------|------------------------|--------|---------------------|-------------------|
| <b>Date:</b>             | 3/7/2018<br>5:06:44 PM | <b>Temperature:</b>    | 4°C    | <b>Data Filter:</b> | Default           |
| <b>Solvent:</b>          | Glycerol               | <b>Solute:</b>         | -      | <b>Laser:</b>       | 100 %             |
| <b>Intensity:</b>        | 286,121<br>counts/s    | <b>Intercept:</b>      | 0.878  | <b>Attenuator:</b>  | 51 %              |
| <b>Z - Av. Diameter:</b> | 15.87nm                | <b>Std. Deviation:</b> | 2.55nm | <b>MW model:</b>    | Globular Proteins |
| <b>Polydispersity:</b>   | 16.05 %                | <b>Pd. Index:</b>      | 0.026  | <b>Remark:</b>      | -                 |

| Peak # | Mean Dh (nm) | Mode Dh (nm) | Std. Dev. (nm) | Polydisp . (%) | Est. MW. (kDa) | Intensity (%) | Mass (%) | Volum e (%) | Numbe r (%) |
|--------|--------------|--------------|----------------|----------------|----------------|---------------|----------|-------------|-------------|
| 1      | 12.23        | 13.49        | 3.36           | 27.50          | 319.05         | 87.84         | 99.99    | 100.00      | 100.00      |
| 2      | 202.86       | 223.97       | 55.84          | 27.53          | Out of Range   | 12.16         | 0.01     | 0.00        | 0.00        |

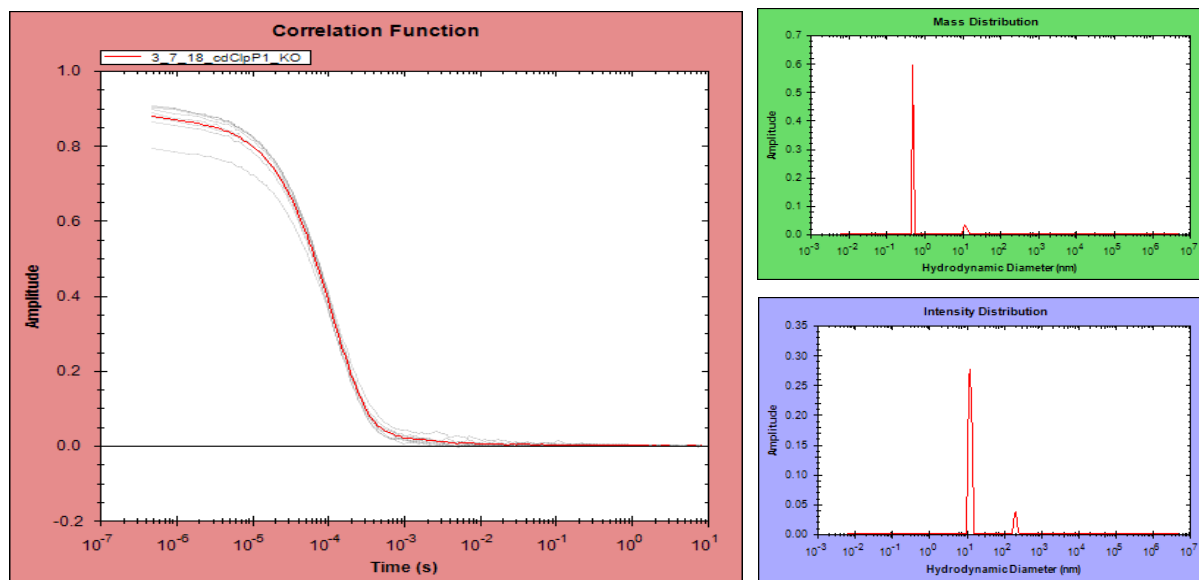

**Figure S2.** pUNK DLS results for ClpP1 prepared from  $\Delta EcClpP$  cells.

**ClpP2  $\Delta$ EcClpP**

|                              |                        |                            |        |                     |                   |
|------------------------------|------------------------|----------------------------|--------|---------------------|-------------------|
| <b>Date:</b>                 | 3/7/2018<br>5:02:24 PM | <b>Temperature:</b>        | 4.02°C | <b>Data Filter:</b> | Default           |
| <b>Solvent:</b>              | Glycerol               | <b>Solute:</b>             | -      | <b>Laser:</b>       | 100 %             |
| <b>Intensity:</b>            | 293,245<br>counts/s    | <b>Intercept:</b>          | 0.923  | <b>Attenuator:</b>  | 57 %              |
| <b>Z - Av.<br/>Diameter:</b> | 14.78nm                | <b>Std.<br/>Deviation:</b> | 5.24nm | <b>MW model:</b>    | Globular Proteins |
| <b>Polydispersity:</b>       | 35.50 %                | <b>Pd. Index:</b>          | 0.126  | <b>Remark:</b>      | -                 |

| Peak # | Mean Dh (nm) | Mode Dh (nm) | Std. Dev. (nm) | Polydisp. (%) | Est. MW. (kDa) | Intensity (%) | Mass (%) | Volume (%) | Number (%) |
|--------|--------------|--------------|----------------|---------------|----------------|---------------|----------|------------|------------|
| 1      | 12.87        | 13.50        | 2.47           | 19.21         | 319.58         | 86.96         | 99.97    | 99.99      | 100.00     |
| 2      | 152.42       | 162.57       | 29.05          | 19.06         | Out of Range   | 13.04         | 0.03     | 0.01       | 0.00       |

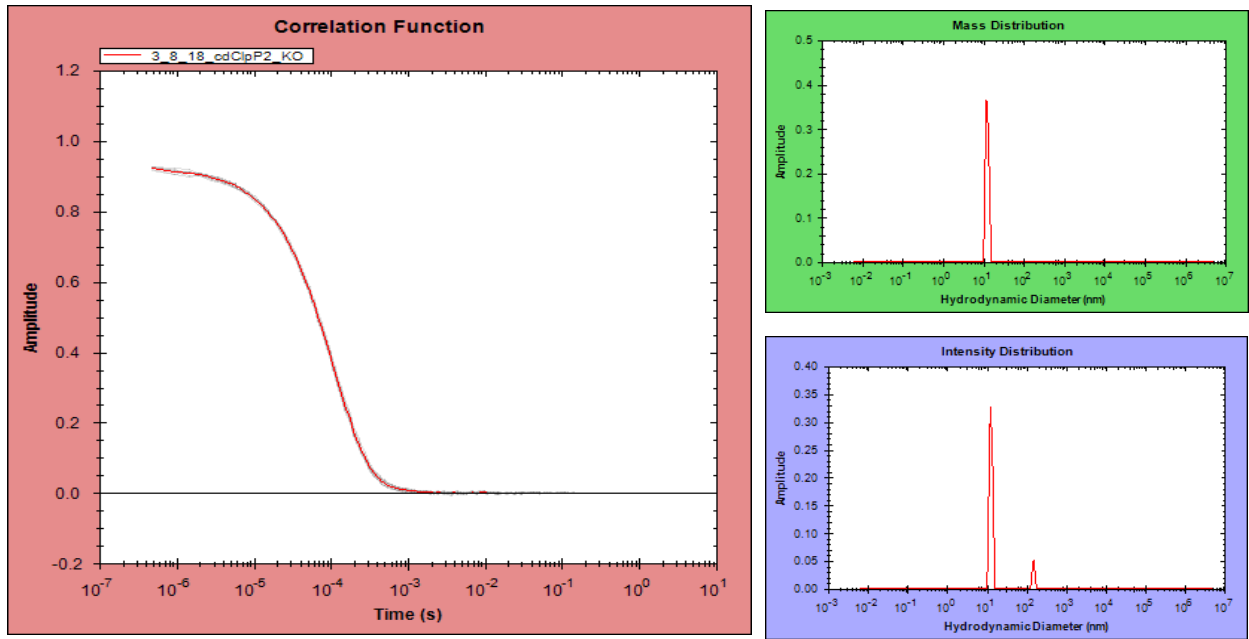

**Figure S3.** pUNK DLS results for ClpP2 prepared from  $\Delta$ EcClpP cells.

| Sequence <b>inputSeq</b> Length <b>196</b> residues                                                                        |          |                         |         |
|----------------------------------------------------------------------------------------------------------------------------|----------|-------------------------|---------|
| Cysteines in this sequence: <b>3</b>                                                                                       |          |                         |         |
| <b>Disulfide Connectivity prediction</b>                                                                                   |          |                         |         |
| <b>Step 1:</b> Running <a href="#">PSI-BLAST</a> with input sequence; click <a href="#">here</a> to see the output         |          |                         |         |
| <b>Step 2:</b> Predicting secondary structure using <a href="#">PSIPRED</a> ; click <a href="#">here</a> to see the output |          |                         |         |
| <b>Step 3:</b> Disulfide Oxidation State Prediction; click <a href="#">here</a> to see the results                         |          |                         |         |
| Warning! The number of predicted half-cystines is lower than 2.                                                            |          |                         |         |
| <b>Step 4:</b> Disulfide Bonds Prediction using a trained Neural Network                                                   |          |                         |         |
| <b>Disulfide bond scores</b>                                                                                               |          |                         |         |
| Cysteine sequence position                                                                                                 | Distance | Bond                    | Score   |
| 86 - 92                                                                                                                    | 6        | MNYVRCDVSTI-DVSTICIGMAA | 0.0104  |
| 86 - 113                                                                                                                   | 27       | MNYVRCDVSTI-THGKRCALPNS | 0.47017 |
| 92 - 113                                                                                                                   | 21       | DVSTICIGMAA-THGKRCALPNS | 0.99116 |

**Figure S4.** Predicted ClpP2 disulfides predicted by DiANNA.

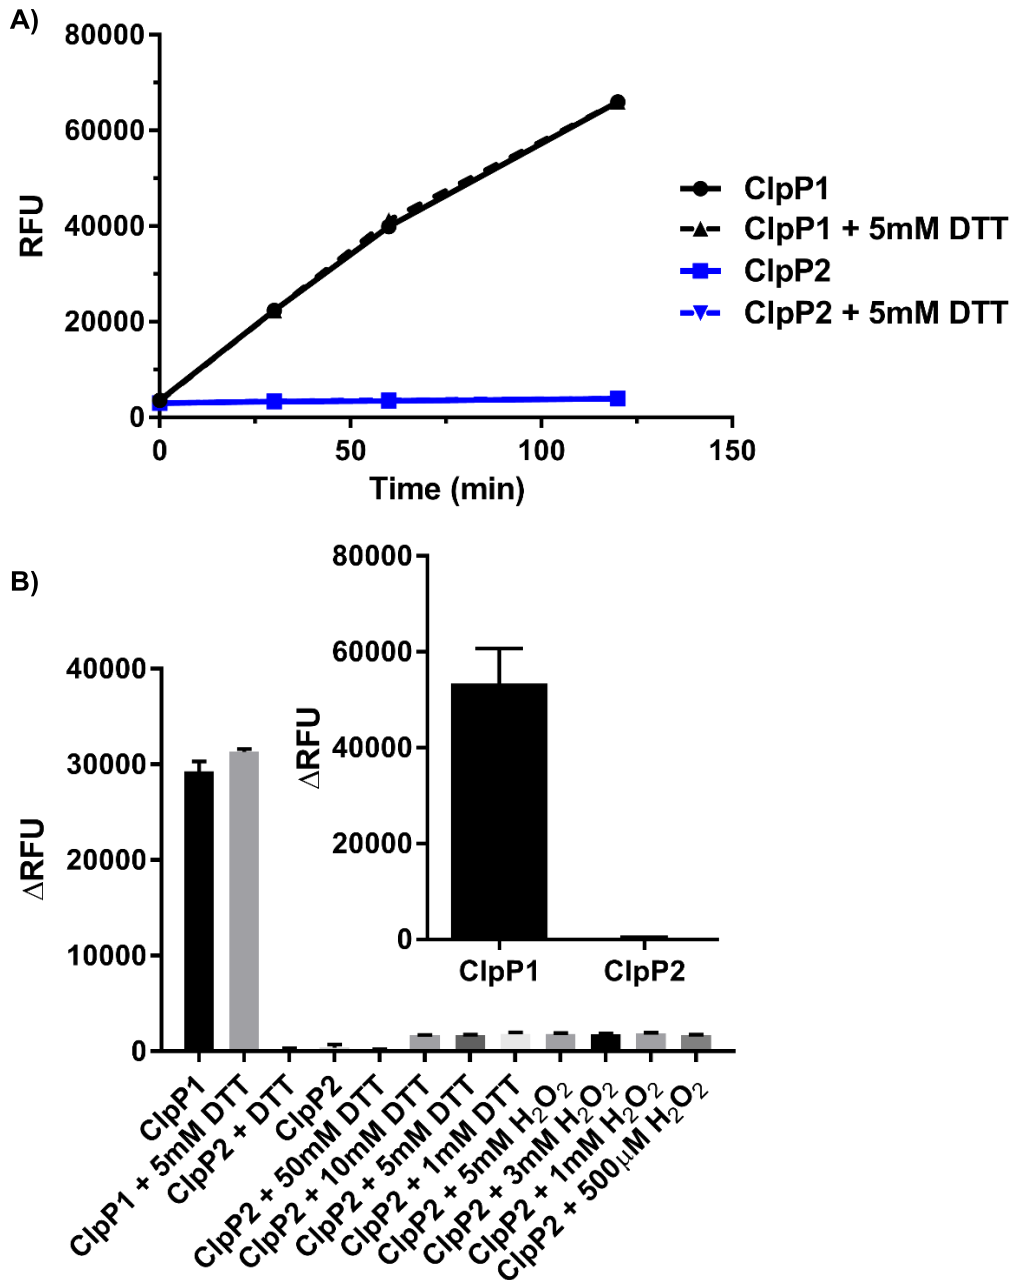

**Figure S5. Reduction or oxidation of ClpP2 has no consequences on proteolytic activity.** A) SLY-AMC peptidolytic assay over 2h, fluorescence measurements taken 30 m, 60 m, and 120 m with and without 5 mM DTT. B) SLY-AMC peptidolytic assay with reducing (DTT) and oxidizing (H<sub>2</sub>O<sub>2</sub>) conditions had no effect on proteolytic activity of ClpP2. Inset, Aliquots from GFP-ssrA degradation assays were diluted 10-fold into 100 μL activity buffer containing 5 mM DTT, and pipetted in triplicate into a black 96-well flat bottom plate. SLY-AMC was added, and the reaction was allowed to proceed for ~48h before reading.

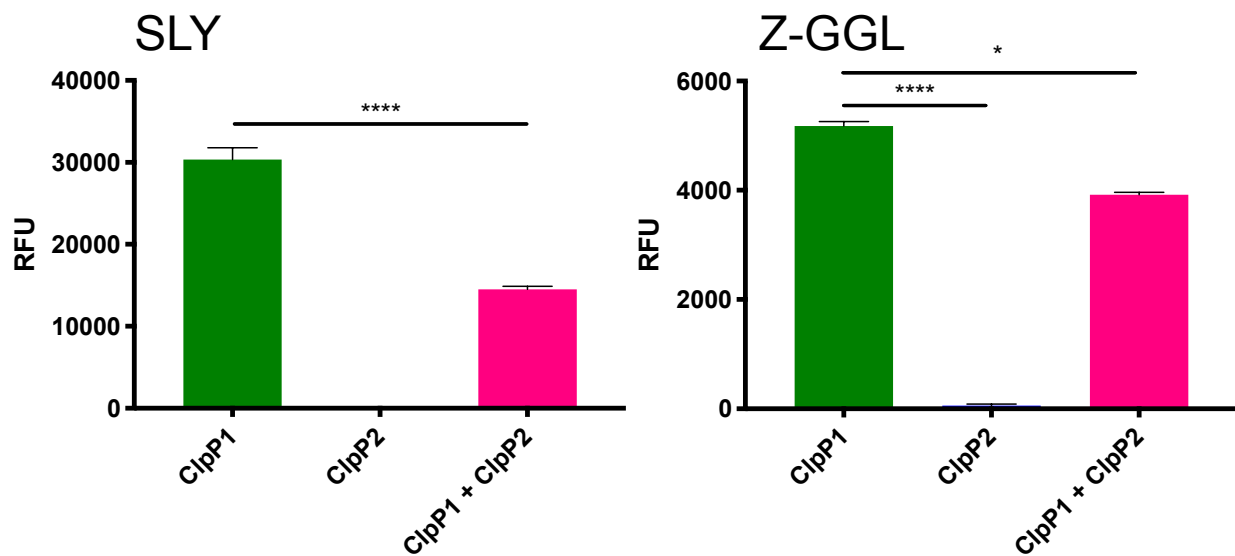

**Rate of Degradation ( $\Delta$ RFU,  $\text{min}^{-1}$ )**

|               | SLY   | Rel. ClpP1 | Z-GGL | Rel. ClpP1 |
|---------------|-------|------------|-------|------------|
| ClpP1         | 1944  | n/a        | 540.6 | n/a        |
| ClpP2         | 21.1  | 1.1        | 8.0   | 1.5        |
| ClpP1 + ClpP2 | 899.8 | 46.3       | 306   | 56.6       |

**Figure S6.** Peptidolytic activity of mixed solutions of ClpP1 and ClpP2 compared to homogenous solutions.

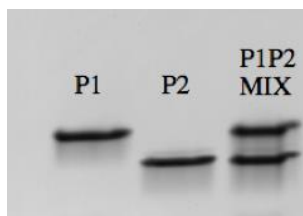

**Figure S7.** Non-denaturing PAGE gel (7-15%) of mixed ClpP1 and ClpP2 homotetradecamers after 2 h.

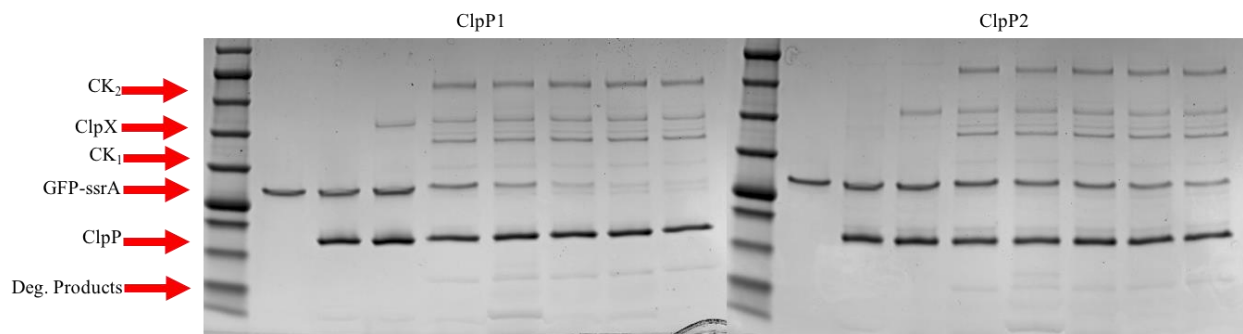

| Lane | Contents                             |
|------|--------------------------------------|
| 1    | GoldBio BlueStain Protein Marker     |
| 2    | ssrA-GFP                             |
| 3    | ssrA-GFP + ClpP                      |
| 4    | ssrA-GFP, ClpP, ClpX, no ATP 5 h     |
| 5    | ssrA-GFP, ClpP, ClpX, + 4 mM ATP 1 h |
| 6    | ssrA-GFP, ClpP, ClpX, + 4 mM ATP 2 h |
| 7    | ssrA-GFP, ClpP, ClpX, + 4 mM ATP 3 h |
| 8    | ssrA-GFP, ClpP, ClpX, + 4 mM ATP 4 h |
| 9    | ssrA-GFP, ClpP, ClpX, + 4 mM ATP 5 h |

**Figure S8.** SDS-PAGE visualization of ssrA-GFP degradation over time via ClpXP in the presence of 4 mM ATP.



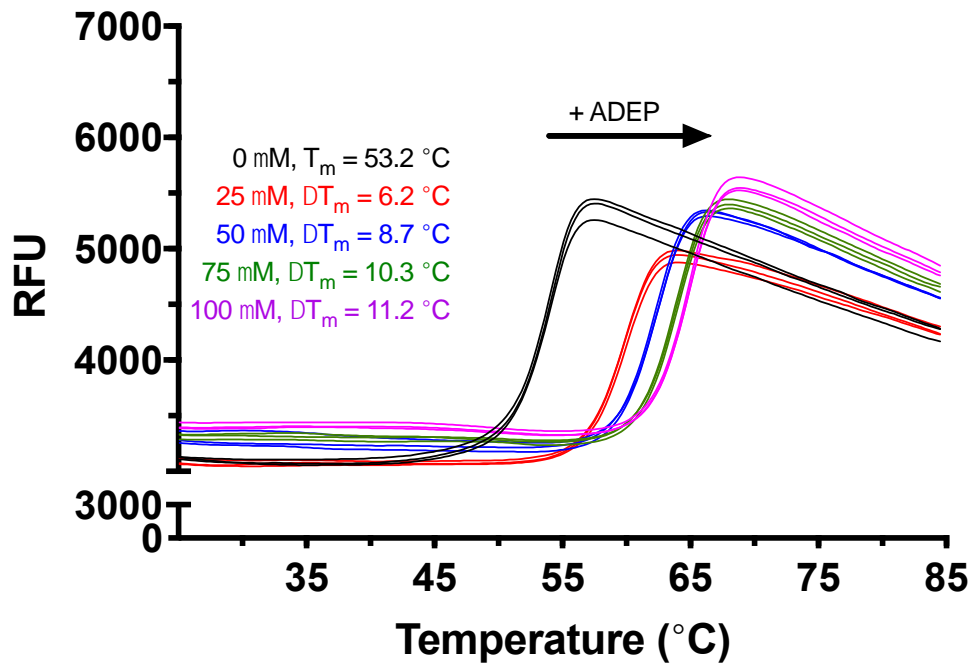

Figure S9. Raw data replicates of ClpP1 + ADEP thermalshift experiments.

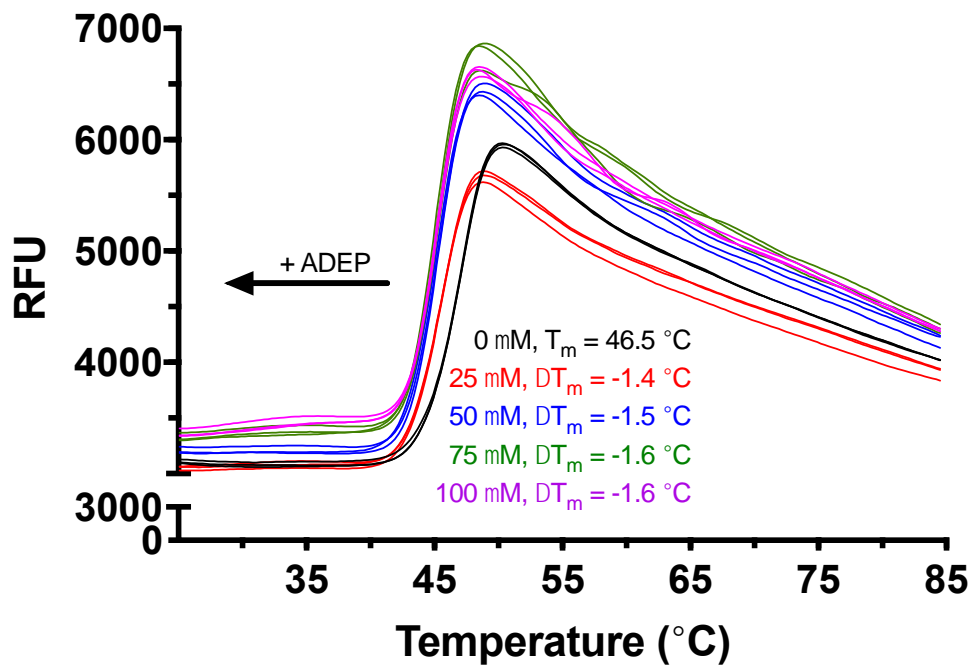

Figure S10. Raw data replicates of ClpP2 + ADEP thermal shift experiments.
